# Supplementary material for: Kinetic mRNA Profiling in a Rat Model of Left-Ventricular Hypertrophy Reveals Early Expression of Chemokines and Their Receptors
Source: PubMed Central journal article supplement (PMC4985150; doi:10.1371/journal.pone.0161273), 2016-08-15
Supplement: pone.0161273.s006.pdf [file pone.0161273.s006.pdf]

| Chemokines    |                      |                 | Chemokine receptors |                      | Inflammatory genes            |                      |                 |
|---------------|----------------------|-----------------|---------------------|----------------------|-------------------------------|----------------------|-----------------|
| <i>CCL1</i>   | <i>Rn01752376_m1</i> | <i>Ct&gt;32</i> | <b>CCR1</b>         | <b>Rn00571950_s1</b> | <i>CRP</i>                    | <i>Rn00567307_g1</i> | <i>Ct&gt;32</i> |
| <b>CCL2</b>   | <b>Rn00580555_m1</b> |                 | <b>CCR2</b>         | <b>Rn01637698_s1</b> | <b>IL1<math>\beta</math></b>  | <b>Rn00580432_m1</b> |                 |
| <b>CCL3</b>   | <b>Rn01464736_g1</b> |                 | <i>CCR3</i>         | <i>Rn02134292_s1</i> | <i>IL6</i>                    | <i>Rn01410330_m1</i> | <i>Ct&gt;32</i> |
| <b>CCL4</b>   | <b>Rn00671924_m1</b> |                 | <i>CCR4</i>         | <i>Rn00591783_s1</i> | <i>IL17A</i>                  | <i>Rn01757168_m1</i> | <i>Ct&gt;32</i> |
| <b>CCL5</b>   | <b>Rn00579590_m1</b> |                 | <b>CCR5</b>         | <b>Rn02132969_s1</b> | <i>IFN<math>\gamma</math></i> | <i>Rn00594078_m1</i> | <i>Ct&gt;32</i> |
| <b>CCL6</b>   | <b>Rn01456400_m1</b> |                 | <i>CCR6</i>         | <i>Rn02534497_s1</i> | <b>TNF<math>\alpha</math></b> | <b>Rn01525859_g1</b> |                 |
| <b>CCL7</b>   | <b>Rn01467286_m1</b> |                 | <i>CCR7</i>         | <i>Rn02758813_s1</i> | <b>NLRP3</b>                  | <b>Rn04244625_m1</b> |                 |
| <b>CCL9</b>   | <b>Rn01471276_m1</b> |                 | <i>CCR9</i>         | <i>Rn02129940_s1</i> | <b>SCF</b>                    | <b>Rn01510586_g1</b> |                 |
| <i>CCL11</i>  | <i>Rn00569995_m1</i> | <i>Ct&gt;32</i> | <i>CCR10</i>        | <i>Rn03037167_s1</i> | <b>RelA</b>                   | <b>Rn01483598_m1</b> |                 |
| <b>CCL12</b>  | <b>Rn01464638_m1</b> |                 | <i>CXCR1</i>        | <i>Rn00570857_s1</i> |                               |                      |                 |
| <i>CCL17</i>  | <i>Rn01536936_g1</i> | <i>Ct&gt;32</i> | <b>CXCR2</b>        | <b>Rn02130551_s1</b> |                               |                      |                 |
| <b>CCL19</b>  | <b>Rn01439563_m1</b> |                 | <i>CXCR3</i>        | <i>Rn02134090_s1</i> |                               |                      |                 |
| <i>CCL20</i>  | <i>Rn00570287_m1</i> | <i>Ct&gt;32</i> | <b>CXCR4</b>        | <b>Rn00573522_s1</b> |                               |                      |                 |
| <b>CCL21</b>  | <b>Rn01764651_g1</b> |                 | <i>CXCR5</i>        | <i>Rn02132880_s1</i> |                               |                      |                 |
| <i>CCL22</i>  | <i>Rn01536591_m1</i> | <i>Ct&gt;32</i> | <b>CXCR6</b>        | <b>Rn03037244_s1</b> |                               |                      |                 |
| <b>CCL24</b>  | <b>Rn01481451_m1</b> |                 | <b>CXCR7</b>        | <b>Rn02134053_s1</b> |                               |                      |                 |
| <i>CCL25</i>  | <i>Rn01403352_m1</i> | <i>Ct&gt;32</i> | <i>XCR1</i>         | <i>Rn03037149_s1</i> |                               |                      |                 |
| <i>CCL26</i>  | <i>Rn01481484_m1</i> | <i>Ct&gt;32</i> | <b>CX3CR1</b>       | <b>Rn02134446_s1</b> |                               |                      |                 |
| <b>CCL27</b>  | <b>Rn01437034_m1</b> |                 | <b>D6</b>           | <b>Rn02347939_s1</b> |                               |                      |                 |
| <i>CCL28</i>  | <i>Rn00586715_m1</i> | <i>Ct&gt;32</i> | <b>DARC</b>         | <b>Rn03037231_s1</b> |                               |                      |                 |
| <b>CXCL1</b>  | <b>Rn00578225_m1</b> |                 |                     |                      |                               |                      |                 |
| <i>CXCL2</i>  | <i>Rn00586403_m1</i> | <i>Ct&gt;32</i> |                     |                      |                               |                      |                 |
| <i>CXCL3</i>  | <i>Rn01414231_m1</i> | <i>Ct&gt;32</i> |                     |                      |                               |                      |                 |
| <b>CXCL4</b>  | <b>Rn01768297_g1</b> |                 |                     |                      |                               |                      |                 |
| <i>CXCL5</i>  | <i>Rn00573587_g1</i> | <i>Ct&gt;32</i> |                     |                      |                               |                      |                 |
| <i>CXCL7</i>  | <i>Rn00596603_g1</i> | <i>Ct&gt;32</i> |                     |                      |                               |                      |                 |
| <b>CXCL9</b>  | <b>Rn00595504_m1</b> |                 |                     |                      |                               |                      |                 |
| <b>CXCL10</b> | <b>Rn01413889_g1</b> |                 |                     |                      |                               |                      |                 |
| <b>CXCL11</b> | <b>Rn00788261_g1</b> |                 |                     |                      |                               |                      |                 |
| <b>CXCL12</b> | <b>Rn00573260_m1</b> |                 |                     |                      |                               |                      |                 |
| <b>CXCL13</b> | <b>Rn01450028_m1</b> |                 |                     |                      |                               |                      |                 |
| <b>CXCL14</b> | <b>Rn01441840_m1</b> |                 |                     |                      |                               |                      |                 |
| <b>CXCL16</b> | <b>Rn01496393_m1</b> |                 |                     |                      |                               |                      |                 |
| <i>CXCL17</i> | <i>Rn01764053_m1</i> | <i>Ct&gt;32</i> |                     |                      |                               |                      |                 |
| <b>XCL1</b>   | <b>Rn00592605_m1</b> |                 |                     |                      |                               |                      |                 |
| <b>CX3CL1</b> | <b>Rn00593186_m1</b> |                 |                     |                      |                               |                      |                 |
