# Supplementary material for: Kinetic mRNA Profiling in a Rat Model of Left-Ventricular Hypertrophy Reveals Early Expression of Chemokines and Their Receptors
Source: PubMed Central journal article supplement (PMC4985150; doi:10.1371/journal.pone.0161273), 2016-08-15
Supplement: pone.0161273.s007.pdf [file pone.0161273.s007.pdf]

|                            | <b>D0</b>   |                | <b>D1</b>   |                | <b>D3</b>   |                | <b>D5</b>   |                | <b>D7</b>   |                | <b>D14</b>  |                |
|----------------------------|-------------|----------------|-------------|----------------|-------------|----------------|-------------|----------------|-------------|----------------|-------------|----------------|
|                            | <i>SHAM</i> | <i>BANDING</i> | <i>SHAM</i> | <i>BANDING</i> | <i>SHAM</i> | <i>BANDING</i> | <i>SHAM</i> | <i>BANDING</i> | <i>SHAM</i> | <i>BANDING</i> | <i>SHAM</i> | <i>BANDING</i> |
| LV area (mm <sup>2</sup> ) | 23.6±0.7    | 21.1±3.1       | 16.9±1.1    | 18.3±0.7       | 21.5±1.3    | 22.2±1.7       | 23.2±0.9    | 24.6±2.1       | 23.0±1.0    | 25.8±2.2       | 34.0±1.0    | 41.6±2.0       |
| LV wall thickness (mm)     | 1.3±0.01    | 1.3±0.09       | 1.1±0.08    | 1.2±0.06       | 1.2±0.02    | 1.5±0.12       | 1.3±0.04    | 1.3±0.05       | 1.3±0.08    | 1.4±0.06       | 1.6±0.05    | 1.9±0.08       |
